# Supplementary material for: Reliability and Quality of YouTube Videos on Ultrasound-Guided Brachial Plexus Block: A Programmatical Review
Source: MDPI journal article supplement (doi:10.3390/healthcare9081083), 2021-08-23
Supplement: s1 [file s1]

## Supplementary Materials

Table S2: The Global Quality Score

| <b>Global Quality Score</b> |                                                                                                     |
|-----------------------------|-----------------------------------------------------------------------------------------------------|
| <b>1</b>                    | Poor quality; very unlikely to be of any use to patients                                            |
| <b>2</b>                    | Poor quality but some information present; of very limited use to patients                          |
| <b>3</b>                    | Suboptimal flow, some information covered but important topics missing; somewhat useful to patients |
| <b>4</b>                    | Good quality and flow, most important topics covered; useful to patients                            |
| <b>5</b>                    | Excellent quality and flow; highly useful to patients                                               |
