# Supplementary material for: Reliability and Quality of YouTube Videos on Ultrasound-Guided Brachial Plexus Block: A Programmatical Review
Source: MDPI journal article supplement (doi:10.3390/healthcare9081083), 2021-08-23
Supplement: s1 [file s1]

## Supplementary Materials

Table S1: The Journal of American Medical Association Score Benchmark Criteria

| <b>The Journal of American Medical Association Benchmark Criteria</b> |                                                                                                                                                                                                       |
|-----------------------------------------------------------------------|-------------------------------------------------------------------------------------------------------------------------------------------------------------------------------------------------------|
| <b>Authorship</b>                                                     | Authors and contributors, their affiliations, and relevant credentials should be provided.                                                                                                            |
| <b>Attribution</b>                                                    | References and sources for all content should be listed clearly, and all relevant copyright information noted.                                                                                        |
| <b>Disclosure</b>                                                     | Web site "ownership" should be prominently and fully disclosed, as should any sponsorship, advertising, underwriting, commercial funding arrangements or support, or potential conflicts of interest. |
| <b>Currency</b>                                                       | Dates that content was posted and updated should be indicated.                                                                                                                                        |
