# Supplementary material for: Reliability and Quality of YouTube Videos on Ultrasound-Guided Brachial Plexus Block: A Programmatical Review
Source: Healthcare (Basel). 2021 Aug 23;9(8):1083. doi: 10.3390/healthcare9081083 (PMC8394722; doi:10.3390/healthcare9081083)
Supplement: Supplementary file 1 [file healthcare-09-01083-s001.zip]

Archive with 9 entries (8 files):
- Figure S1.png
- Table S1.pdf
- Table S2.pdf
- Table S3.csv
- __MACOSX/
- __MACOSX/._Figure S4.png
- __MACOSX/._Table S1.docx
- __MACOSX/._Table S2.docx
- __MACOSX/._Table S3.csv
