# Supplementary material for: Reliability and Quality of YouTube Videos on Ultrasound-Guided Brachial Plexus Block: A Programmatical Review
Source: Healthcare (Basel). 2021 Aug 23;9(8):1083. doi: 10.3390/healthcare9081083 (PMC8394722; doi:10.3390/healthcare9081083)
Supplement: Supplementary file 1 [file healthcare-09-01083-s001.zip › Table S3.csv]

Table S3. Metrics, Reliability, and Quality Assessments of iIcluded 175 videos
ID	Group	Date	BSQS	GQS	JAMA	ViewCount	LikeCount	DislikeCount	CommentCount	ViewRatio	LikeRatio	VPI	Length
WqNmWAPFB7c	2	2009-12-31T23:45:25Z	11	2	1	85382	107	9	7	22.08535954	92.24137931	20.37184027	7:09
YPRSDElCcqA	2	2008-07-02T21:43:48Z	8	2	1	36354	29	4	4	8.237933379	87.87878788	7.239395999	2:23
awirjD-aLi8	2	2009-07-07T13:06:22Z	8	1	1	2997	3	0	1	0.741281227	100	0.741281227	2:45
w0Nwm687hf0	2	2008-08-29T22:51:51Z	13	4	1	66336	70	11	8	15.23214696	86.41975309	13.16358379	2:11
8EYq9LrUqqA	1	2008-11-25T14:44:58Z	6	2	1	4662	1	0	0	1.092570893	100	1.092570893	1:59
QIz6p2Z1Qu8	4	2009-06-11T20:31:53Z	8	1	1	14632	2	0	1	3.595969526	100	3.595969526	1:30
ZiuHXtd39Us	1	2011-05-17T23:26:38Z	12	2	0	1143	1	0	0	0.339774078	100	0.339774078	4:48
UmG-bgEQQ4E	4	2013-09-19T18:21:24Z	13	3	2	88022	168	6	2	35.09649123	96.55172414	33.88626739	4:06
Zke6938Y1k4	4	2013-09-19T18:18:21Z	14	3	2	189364	412	30	14	75.50398724	93.21266968	70.37928222	3:54
DdbtAClkBAs	4	2013-09-19T18:10:34Z	12	2	2	152063	380	21	8	60.63118022	94.76309227	57.45598126	4:39
6HhKpLEdGWY	3	2014-04-04T17:05:09Z	10	2	0	13255	24	4	1	5.735612289	85.71428571	4.916239105	2:34
I680wztrATc	4	2014-11-20T16:41:45Z	5	1	1	1005	3	0	0	0.482940894	100	0.482940894	0:40
v-_OKiL0gU4	1	2014-05-30T20:38:15Z	7	2	0	228	5	0	0	0.101108647	100	0.101108647	1:58
XsGneMPQdA0	1	2014-06-27T22:26:30Z	7	2	0	221	1	0	0	0.099236641	100	0.099236641	3:16
Zbsql97rL00	1	2013-07-11T12:34:05Z	1	1	0	1282	10	0	0	0.497284717	100	0.497284717	2:01
SiFv7wn8R-0	1	2014-10-05T10:58:21Z	7	2	0	126	2	0	0	0.059238364	100	0.059238364	3:16
3yVkcXy2eyc	1	2014-05-03T22:47:00Z	10	2	0	3618	32	6	3	1.585451358	84.21052632	1.335116933	16:26
G7pCWOwHBAI	1	2014-04-24T21:22:57Z	11	3	0	799	2	0	4	0.348756002	100	0.348756002	7:25
0Y-BHHQkli8	1	2014-06-10T14:08:30Z	7	2	0	62	0	0	0	0.027629234	NA	NA	1:29
mcviAWpOz88	1	2014-01-22T23:48:41Z	9	2	0	356	1	1	0	0.149391523	50	0.074695762	14:47
pF6QWqydDZE	1	2014-07-03T00:35:39Z	7	2	0	426	2	1	0	0.191805493	66.66666667	0.127870329	2:58
vlHx_pUq4-I	1	2014-06-04T14:07:14Z	7	2	0	29	0	0	0	0.012888889	NA	NA	3:33
cEmCSXehDFw	2	2015-06-06T11:22:54Z	10	2	1	16678	71	13	7	8.857142857	84.52380952	7.486394558	7:11
8ZCb8tiGpoA	4	2015-06-25T14:12:13Z	6	2	1	1163	1	0	0	0.623927039	100	0.623927039	1:12
qjOtYkM3ofw	1	2015-02-08T17:57:34Z	11	2	0	931	2	0	0	0.465267366	100	0.465267366	2:52
mVx99DnLUTo	1	2015-02-18T19:42:55Z	11	2	0	514	2	0	0	0.258161728	100	0.258161728	3:30
C5_x8gYbxcc	1	2015-06-07T15:59:47Z	8	1	0	314	1	0	0	0.166843783	100	0.166843783	0:35
f2I5ZqVR1zc	1	2015-02-15T18:24:56Z	11	2	0	267	0	0	0	0.133901705	NA	NA	2:14
ZUuyEMfyQW0	1	2015-04-29T12:44:42Z	3	1	0	58	1	0	0	0.030192608	100	0.030192608	0:56
tORfiSfi1Mw	1	2015-01-05T12:13:50Z	4	1	0	37	1	0	0	0.018181818	100	0.018181818	2:00
wUM-Ig-4uKk	2	2015-02-17T10:43:32Z	5	1	1	99	0	0	0	0.049698795	NA	NA	2:21
RENhHjn9X5Y	1	2015-01-22T16:00:20Z	1	1	0	39	0	0	0	0.019326065	NA	NA	4:57
YUJfRGIcoDQ	3	2016-05-21T19:13:08Z	12	2	2	20961	82	3	0	13.67318982	96.47058824	13.19060665	2:49
7WfWIdGXGJw	3	2016-05-21T18:24:57Z	11	2	2	42760	164	11	1	27.89302022	93.71428571	26.13974466	2:45
RQQ5dKSQdgc	3	2016-05-21T16:20:17Z	12	2	2	370	3	0	0	0.241356817	100	0.241356817	2:22
tTGNM6KvB08	3	2016-05-21T18:06:52Z	12	2	2	1546	12	0	0	1.008480104	100	1.008480104	4:35
cOdj3akYwx8	1	2016-01-21T14:37:20Z	4	1	0	430	5	1	0	0.259975816	83.33333333	0.216646514	1:29
ouWdpjXKAY8	2	2016-04-08T18:58:12Z	1	1	1	554	2	0	0	0.351522843	100	0.351522843	3:55
v1FpZr3xY1g	2	2016-04-11T13:26:14Z	2	1	1	436	2	0	0	0.277177368	100	0.277177368	4:42
9HK0-4Y1xOU	1	2016-08-03T17:00:06Z	8	1	0	376	10	0	1	0.257710761	100	0.257710761	3:09
waP8Z8OaF2c	1	2016-01-31T15:52:28Z	4	1	0	437	2	0	0	0.265815085	100	0.265815085	4:46
FOLsBYI1aEI	1	2016-01-28T19:36:44Z	4	1	0	284	1	0	0	0.17243473	100	0.17243473	1:20
kxpvGGOrWeI	1	2016-10-09T07:26:31Z	1	1	0	566	6	0	0	0.406609195	100	0.406609195	1:50
JCLEhptczEc	1	2016-10-09T06:52:32Z	1	1	0	144	4	0	0	0.103448276	100	0.103448276	2:33
sIYPHKlFcwY	3	2017-11-07T13:53:41Z	12	2	2	8165	46	3	1	8.181362725	93.87755102	7.680462967	3:38
5o3TvsyJZig	3	2017-09-16T07:58:16Z	12	2	2	20126	101	4	0	19.16761905	96.19047619	18.43742404	3:08
Vn7NwYsebKs	1	2017-09-21T18:18:22Z	10	1	0	3762	13	7	0	3.6	65	2.34	9:57
PPVo53cwGMo	1	2017-05-12T19:04:56Z	6	2	0	1514	4	0	0	1.286321155	100	1.286321155	3:03
qRUPASyp5fs	1	2017-03-28T14:41:53Z	8	2	0	1774	10	0	0	1.451718494	100	1.451718494	8:17
3V_bfgLb0zc	2	2017-10-06T13:00:12Z	5	1	1	147	2	0	0	0.142718447	100	0.142718447	4:42
BQFMat3H9Zw	1	2017-06-23T11:05:21Z	14	3	0	543	11	2	7	0.478414097	84.61538462	0.404811928	7:14
paYKAZ6TWdI	1	2017-03-29T20:22:39Z	7	1	0	330	21	0	0	0.27027027	100	0.27027027	2:45
iBJ_m5aYoUY	1	2017-09-03T07:34:04Z	0	1	0	513	1	0	0	0.482596425	100	0.482596425	0:22
oRWQVyoSgAE	1	2017-05-12T17:59:41Z	1	1	0	80	1	0	0	0.067969414	100	0.067969414	0:15
901qXfTK7d4	1	2017-09-10T12:25:24Z	4	1	0	335	4	0	0	0.317234848	100	0.317234848	1:20
VLp7UAvMiak	4	2018-06-26T11:33:17Z	8	2	0	32956	271	7	5	42.96740548	97.48201439	41.88549239	7:37
3sREo_SUW1U	4	2018-07-06T11:29:33Z	13	3	2	21475	208	10	1	28.36856011	95.41284404	27.06725001	3:42
vaMXLf7HJJ4	1	2018-05-21T17:18:00Z	6	2	0	4880	15	0	1	6.077210461	100	6.077210461	1:12
_bmHguLcheU	1	2018-06-13T11:41:26Z	3	1	0	2363	8	0	4	3.029487179	100	3.029487179	2:05
sywJG5ivk_A	1	2018-07-03T11:35:58Z	5	1	0	1438	7	0	0	1.892105263	100	1.892105263	2:00
k-VuxLglSFM	4	2018-11-09T12:40:38Z	9	1	1	633	7	0	0	1.003169572	100	1.003169572	3:50
FHzT_2lRIQo	4	2018-09-16T13:10:59Z	8	1	1	906	13	0	0	1.322627737	100	1.322627737	2:49
OhzoylAsStM	2	2018-04-07T02:33:47Z	5	1	1	447	8	0	0	0.527744982	100	0.527744982	1:02
FocWxnw5Wio	1	2018-02-15T12:58:44Z	3	1	1	29	1	0	0	0.032293987	100	0.032293987	3:28
SVE1x6wUhwM	1	2018-01-17T10:15:43Z	5	1	0	61	1	0	0	0.065803668	100	0.065803668	2:07
Q0YJLQsN4Q0	2	2018-01-17T10:15:43Z	1	1	0	42	0	0	0	0.045307443	NA	NA	1:00
Iega6O6IQM8	4	2019-05-07T19:13:18Z	13	2	2	39974	322	10	4	88.4380531	96.98795181	85.77425632	9:52
_hjZ12jA5D4	4	2019-02-28T19:53:26Z	7	2	0	533	11	0	2	1.025	100	1.025	2:19
jgTfhZM9oOM	1	2019-04-09T10:20:30Z	10	2	0	479	1	0	0	0.997916667	100	0.997916667	6:14
KwxcmRw28is	1	2019-08-18T17:15:35Z	10	2	0	787	15	0	1	2.255014327	100	2.255014327	10:06
oglfl1gAjXE	1	2019-01-23T08:12:19Z	14	4	0	437	14	0	2	0.785971223	100	0.785971223	5:01
qGOhUEqW8gA	1	2019-03-20T18:26:53Z	6	1	0	98	3	0	0	0.196	100	0.196	3:49
DglEv7hKJqM	1	2019-06-08T01:32:42Z	7	1	0	395	3	0	0	0.94047619	100	0.94047619	2:28
Y6OShCm-xTU	2	2019-08-13T18:26:42Z	13	3	1	169	2	0	2	0.47740113	100	0.47740113	22:26
oxa0W7NaF3M	1	2019-03-05T06:56:04Z	8	2	0	58	0	0	0	0.112621359	NA	NA	3:10
T2b0IR8dPGA	4	2019-12-29T23:38:36Z	6	1	3	109	0	0	0	0.50462963	NA	NA	2:01
5zxDoNJs8Ko	2	2019-03-14T05:11:53Z	10	2	1	84	0	0	0	0.166007905	NA	NA	2:22
Qc7Gm5TY9q0	2	2019-07-03T03:23:04Z	7	1	1	97	0	0	0	0.24556962	NA	NA	1:01
7hbsNAqy2hE	2	2019-07-03T03:23:44Z	7	1	2	104	0	0	0	0.263291139	NA	NA	0:51
9CU69QLyzqM	1	2019-06-03T14:37:49Z	1	1	0	25	0	0	0	0.058823529	NA	NA	4:00
tPdbHxMVhO4	2	2019-07-03T03:22:48Z	9	2	3	47	0	0	0	0.118987342	NA	NA	0:57
KG7P8_CsYNU	2	2019-07-03T03:25:22Z	6	1	2	34	0	0	0	0.086075949	NA	NA	1:25
jWufkXNabyU	1	2019-06-03T15:50:56Z	3	1	0	18	0	0	0	0.042352941	NA	NA	2:00
eBSZLt1gzFs	1	2019-06-03T14:42:45Z	2	1	0	14	0	0	0	0.032941176	NA	NA	2:18
C-ToJP76z34	1	2008-12-14T20:39:59Z	14	2	0	54223	45	8	3	12.7643597	84.90566038	10.8376639	3:19
Dg9BJ-32yLc	3	2010-12-04T08:02:52Z	14	2	1	302796	702	41	18	85.82653061	94.48183042	81.09047711	5:04
h_30mwMLH6M	2	2011-01-19T00:03:26Z	14	2	1	250638	360	31	10	71.98104538	92.07161125	66.27410827	3:25
0Cboqf1Qnhc	4	2011-06-01T20:09:57Z	10	2	1	44468	140	9	3	13.27799343	93.95973154	12.47596698	5:04
UilwsIlcMcM	1	2011-12-09T17:17:12Z	14	2	2	49637	232	3	4	15.7178594	98.72340426	15.51720588	7:41
ebMvD4c8adg	4	2011-10-26T14:58:26Z	10	2	0	10384	12	3	2	3.242973142	80	2.594378513	2:58
skWTfAmAGcs	2	2011-01-18T23:14:47Z	15	2	3	20140	30	1	1	5.782371519	96.77419355	5.595843405	3:52
rKDldjK4l6Y	2	2011-02-01T18:18:30Z	7	1	2	481	2	0	0	0.138656673	100	0.138656673	1:18
OhFs-batCSY	4	2013-03-08T21:57:14Z	10	1	1	101113	144	16	7	37.40769515	90	33.66692564	4:38
YeUNkB06yL4	4	2013-11-30T14:08:21Z	11	2	2	31907	98	8	1	13.09811166	92.45283019	12.10957493	7:58
GaBj9-NbGfM	4	2015-07-17T17:54:47Z	10	1	1	3646	1	2	0	1.97937025	33.33333333	0.659790083	3:13
_QxnFylNybI	3	2014-02-23T23:12:37Z	15	2	1	2818	0	0	0	1.198638877	NA	NA	1:56
jQWNTvU0aac	4	2015-07-17T17:58:10Z	9	1	0	859	2	0	0	0.466340934	100	0.466340934	3:11
0wcX56wyCyk	4	2015-07-17T17:56:08Z	4	1	0	584	1	0	0	0.317046688	100	0.317046688	1:43
lsdtpo6Dx5o	2	2017-12-13T23:40:41Z	17	4	2	5639	42	4	1	5.861746362	91.30434783	5.352029287	3:21
KRyIQ9MVZl0	4	2016-02-23T17:44:44Z	13	2	1	15584	60	5	1	9.61381863	92.30769231	8.87429412	5:13
rMMRVdS1FWk	4	2017-01-25T18:43:54Z	12	2	1	211	3	0	1	0.164330218	100	0.164330218	6:49
XCzbPxqmJx4	2	2017-11-22T13:58:37Z	13	2	1	143	0	0	0	0.145473042	NA	NA	2:24
QMNStjnzbrs	1	2017-12-25T19:43:17Z	12	1	3	135	2	0	0	0.142105263	100	0.142105263	1:59
1LdyLhUH--4	2	2017-11-22T13:58:38Z	10	1	1	105	0	0	0	0.10681587	NA	NA	2:12
sk3hk7j1zzA	4	2018-04-05T19:38:14Z	17	3	1	19418	0	0	0	22.87161366	NA	NA	17:04
ztOIvfjsB-U	3	2010-12-04T08:13:36Z	11	2	1	222684	554	38	4	63.11904762	93.58108108	59.06748713	4:35
ZD8AUCJzYeE	2	2011-01-19T22:44:34Z	10	1	1	85671	99	15	5	24.60396324	86.84210526	21.36659966	2:47
FeQfAlJkPk8	2	2012-09-17T23:38:40Z	11	2	1	79955	187	19	1	27.81043478	90.77669903	25.24539468	7:22
eZAIH1Xx-KE	1	2011-12-09T17:43:11Z	12	2	2	57774	182	13	4	18.29449018	93.33333333	17.0748575	8:00
#NAME?	3	2011-10-26T15:12:19Z	10	1	0	4311	3	1	0	1.346346034	75	1.009759525	2:05
V2RHreUQ8fQ	2	2011-02-02T16:27:00Z	7	1	1	502	1	0	0	0.144752018	100	0.144752018	1:52
hEkIIapBzQE	1	2011-02-15T01:00:47Z	11	2	0	599	0	1	0	0.173371925	0	0	1:11
by28CWp-H-o	4	2014-12-01T22:02:02Z	15	3	1	69968	473	13	6	33.80096618	97.32510288	32.89682511	5:11
cA44UqLVC8k	4	2014-10-09T13:19:42Z	12	1	1	117784	725	21	21	55.47998116	97.1849866	53.91821225	7:26
FgH5RWkhD0g	4	2013-03-08T21:57:41Z	9	1	1	22043	45	4	0	8.155012949	91.83673469	7.489297606	4:39
jSlPh_xsNeY	1	2014-03-21T21:08:47Z	9	1	1	1111	4	0	0	0.477849462	100	0.477849462	10:18
z3MRbgcCNlo	1	2013-02-03T21:29:33Z	12	2	1	505	2	0	1	0.184576023	100	0.184576023	2:34
MRQGrheMm24	1	2015-12-23T18:36:30Z	9	1	0	37	1	0	0	0.021984551	100	0.021984551	5:25
pvoWc1y7uVA	1	2016-07-15T13:16:22Z	14	2	1	8345	38	4	0	5.646143437	90.47619048	5.108415491	6:58
I2qY7cGUkWE	1	2016-05-15T05:39:14Z	11	1	1	902	4	0	0	0.586094867	100	0.586094867	3:01
dWwFo4Kh6UE	1	2018-01-07T17:14:16Z	19	4	3	2737	23	0	1	2.921024546	100	2.921024546	3:13
XQbY_8Qco0Q	2	2017-11-22T13:58:37Z	9	1	1	207	0	0	0	0.210579858	NA	NA	2:55
pmwNU4diMqM	1	2009-05-12T16:21:08Z	14	2	0	10805	4	0	1	2.636008783	100	2.636008783	6:11
hRyDtXrfYqc	3	2010-12-04T08:01:20Z	11	2	1	156044	346	24	11	44.23015873	93.51351351	41.36117546	4:49
Z9woYkyJl_U	4	2013-03-08T21:56:47Z	11	1	1	42087	86	9	3	15.57047725	90.52631579	14.0953794	4:57
HtDEYcxtE5w	2	2013-01-07T18:06:44Z	14	2	1	42843	0	0	0	15.50597177	NA	NA	9:26
M8MNt6s-j_E	1	2011-07-30T20:26:24Z	13	2	1	1774	3	0	0	0.539209726	100	0.539209726	1:28
0GaVjP-SGcE	1	2016-06-15T14:21:52Z	12	3	1	559	0	0	0	0.370689655	NA	NA	3:13
YoRAMwznyPM	1	2018-01-08T17:49:01Z	16	3	3	591	10	0	0	0.631410256	100	0.631410256	3:24
RgTkgKv9pBA	1	2009-05-14T16:32:42Z	7	1	0	15800	5	1	0	3.856480351	83.33333333	3.213733626	9:40
mKePf2Upx_M	1	2009-05-14T18:00:55Z	5	1	0	12471	3	0	1	3.043934586	100	3.043934586	7:13
VMbUQkHYrSc	1	2009-05-14T18:46:41Z	5	1	0	7474	3	2	0	1.824261655	60	1.094556993	4:19
GaH-CO6OrV0	4	2010-12-04T07:45:54Z	13	3	1	196981	374	29	8	55.83361678	92.80397022	51.81581309	5:58
3iVjzo13w9g	2	2012-11-16T17:40:56Z	12	3	0	42740	73	9	3	15.18294849	89.02439024	13.51652731	9:07
3MBmUFMoH7w	3	2011-11-14T23:14:44Z	11	2	1	51576	96	5	2	16.20358153	95.04950495	15.40142403	2:39
shF0xrBmogc	1	2012-05-15T06:28:06Z	11	2	0	2791	8	0	0	0.930333333	100	0.930333333	6:41
ACyt9wnGWvI	2	2010-12-11T03:35:30Z	7	1	1	14434	6	1	0	4.099403579	85.71428571	3.513774496	1:46
KvBxAg6jPJ8	2	2011-02-01T13:56:54Z	7	1	1	267	0	1	0	0.076967426	0	0	1:46
6JkOX0asFgg	1	2013-09-26T17:12:37Z	11	2	0	825	0	0	0	0.329868053	NA	NA	22:32
WjTcvqO33_o	4	2012-01-14T15:10:58Z	3	1	1	10422	0	0	0	3.338244715	NA	NA	0:42
Kw9yrqVylhc	2	2010-02-18T03:16:11Z	8	2	1	2620	1	0	0	0.686402934	100	0.686402934	1:19
3utZmyOXrYg	3	2013-12-13T14:56:30Z	11	2	1	2644	9	1	0	1.091209245	90	0.98208832	2:39
RjMBACaRsQA	1	2010-05-06T14:15:47Z	4	1	0	2444	4	0	0	0.653475936	100	0.653475936	0:48
z3MRbgcCNlo	1	2013-02-03T21:29:33Z	12	3	0	505	2	0	1	0.184576023	100	0.184576023	2:34
H-hUrncINxs	4	2014-07-16T19:34:09Z	15	3	1	128149	392	25	9	58.03849638	94.00479616	54.55897022	14:10
pmLRFMBHRww	3	2014-01-08T09:22:48Z	9	1	0	11186	0	0	0	4.666666667	NA	NA	2:15
IPguXhpLtGw	1	2014-05-11T11:47:55Z	1	1	0	785	2	1	0	0.345206684	66.66666667	0.23013779	4:38
pVjZBv8krXk	1	2014-12-24T09:59:28Z	5	1	0	80	0	0	0	0.039081583	NA	NA	3:59
dlMatxw0oaU	1	2014-08-15T00:58:10Z	1	1	1	22	0	0	0	0.01010101	NA	NA	1:00
hSQUKiBH888	1	2014-10-22T13:25:50Z	1	1	0	26	1	0	0	0.012322275	100	0.012322275	3:32
SvJaCkX7TfQ	1	2014-09-09T10:09:58Z	4	1	0	19	1	0	0	0.008824895	100	0.008824895	1:56
bFPuQyGXaR4	1	2014-05-24T14:40:54Z	1	1	0	482	2	0	0	0.213180009	100	0.213180009	1:54
NvvTAY_srnw	3	2014-02-07T12:32:44Z	10	2	1	45	0	0	0	0.019011407	NA	NA	5:59
iP7u2e30cAA	3	2014-02-08T02:02:20Z	11	2	1	99	0	0	0	0.041842773	NA	NA	2:39
n9T3BtFj8FQ	1	2015-01-12T20:43:53Z	10	2	1	28714	124	13	11	14.15877712	90.51094891	12.81524352	5:55
Ixap6n6P5Zw	3	2015-05-11T17:25:02Z	8	1	1	339	0	0	0	0.177579885	NA	NA	2:15
zPXulxPhpPw	1	2015-06-22T23:06:45Z	7	2	0	44	0	0	0	0.02356722	NA	NA	4:00
osBHlSyEfCw	2	2015-11-18T12:42:17Z	5	1	1	2336	6	4	2	1.359720605	60	0.815832363	3:38
BZXOp0kFn6Q	1	2015-02-25T14:34:30Z	7	2	0	101	1	0	0	0.050907258	100	0.050907258	3:16
CnL1XHIT67Q	1	2015-07-16T15:11:18Z	4	1	0	2482	0	1	1	1.346717309	0	0	2:41
QEv2wJpMa2I	2	2015-11-26T06:18:19Z	5	1	1	726	7	1	0	0.424561404	87.5	0.371491228	5:55
nEzwvp3InFc	1	2015-07-30T21:56:52Z	4	1	0	25	0	0	0	0.013668671	NA	NA	4:00
c-5s6HhxENo	1	2015-01-07T17:44:48Z	4	1	0	46	0	0	0	0.02262666	NA	NA	4:00
H_IIm9RySKM	1	2015-05-10T11:50:11Z	6	2	0	43	0	0	0	0.022513089	NA	NA	5:00
azDTkhdhusA	1	2016-11-10T13:43:17Z	8	1	0	2194	13	0	0	1.613235294	100	1.613235294	3:57
sUo-a8Z0wkg	1	2017-12-26T16:56:26Z	9	1	0	145	6	0	0	0.152792413	100	0.152792413	1:52
Bi92UrlqbTA	2	2016-05-10T08:09:20Z	11	3	1	517	6	1	0	0.33484456	85.71428571	0.287009623	7:21
bjkOwPaZeoM	1	2017-11-21T09:31:48Z	9	2	0	485	0	0	0	0.492886179	NA	NA	2:11
M6BpsA4xjKA	1	2016-06-23T15:24:55Z	6	1	0	397	1	0	0	0.264666667	100	0.264666667	1:24
OMXAfw-K2ZY	1	2016-03-24T11:22:28Z	4	1	0	3	0	0	0	0.001885607	NA	NA	1:14
3sREo_SUW1U	4	2018-07-06T11:29:33Z	12	2	1	21475	208	10	1	28.36856011	95.41284404	27.06725001	3:42
K7OoLZ1PqKE	4	2018-01-08T17:43:14Z	14	3	3	194	12	0	0	0.207264957	100	0.207264957	2:42
YK1EuMXB-mg	4	2019-05-29T13:10:35Z	9	2	1	1107	3	0	0	2.574418605	100	2.574418605	1:47
w6g47MNgYEA	2	2019-05-18T10:52:37Z	11	3	2	370	4	0	0	0.839002268	100	0.839002268	2:59
AXULNOowlDU	1	2019-12-20T14:37:40Z	11	2	0	186	13	0	1	0.826666667	100	0.826666667	5:44
	1; Individual 2; Academic 3; Manufacturer 4; Educational
